# Supplementary material for: Single-blind inter-comparison of methane detection technologies – results from the Stanford/EDF Mobile Monitoring Challenge
Source: Oxford University Press journal article supplement (doi:10.1525/elementa.373), 2019-01-01
Supplement: elementa-7-373-s4.xlsx [file elementa-7-373-s4.xlsx]

## Sheet: Read ME
			NOTES
			1	Release rates are in standard cubic feet per hour (scfh)
			2	Gas composition is approximately 87% methane ; Flow rates are given in whole gas flow rate
			3	All times are in local Mountain Time
			4	Release data for each day is given in a separate tab
			5	Example Table data
				Measurement Time Block	Round Number	Time per leak (min)	Pad 1	Pad 2	Pad 3	Pad 4	Pad 5		Pad 1	Pad 2	Pad 3	Pad 4	Pad 5
													Team Locations
				Measurement Time Block		Approximate time interval for measurement in that particular round
				Round Number		Round number for each day where a team stays on the same pad
				Time per leak (min)		Time allotted for measurement (both detection and/or quantification)
				Pad 1 - 5		Pad numbers based on the figure below
					Information available for each pad
					Leak rate	Emission rate in standard cubic feet per hour (scfh)
					Latitude	Latitude coordinates for the emission source
					Longitude	Longitude coordinate for the emission source
					Equipment	Equipment group (W: well-head, S: separator, T: tank) and number (given in parenthesis as a number, identified west to east in the picture below)
					Component	Emitting component
				Team locations		Location of each team for the given round
			6	Day 5: All teams were given the same leak scenario across the entire facility
			7	Cell Shading Guidelines
					Type	Definition			Shading of each Pad Information
					Level-1 detection	Team correctly identifies equipment group and equipment number			Equipment - Green; Component - Green
					Level-2 detection	Team correctly identifies equipment group but wrong equipment number			Equipment - Red; Component - Green
					Level-3 detection	Team mis-identifies equipment group or does not identify any emission			Equipment - Red; Component - Red
			9	All leaks can be assumed to be steady state value, with an error of +/- 5% (upper limit)
			10	Legend (components)	K	Kimray
			11	All equipments are numbered from left to right (west to east) in scenarios where there are multiple equipment of the same group
			12	Grayed out cells refer to tests that a particular team did not participate in (other teams were on that pad)

## Sheet: Day1_4_9
SINGLE LEAK BINARY DETECTION - YES/NO, 10 MIN/LEAK
Measurement Time Block	Round Number	Time per leak (min)	Pad 1					Pad 2					Pad 3					Pad 4						Pad 1	Pad 2	Pad 3	Pad 4
			Leak rate (scfh)	Location (latitude)	Location (longitude)	Equipment (number)	Component	Leak rate (scfh)	Location (latitude)	Location (longitude)	Equipment (number)	Component	Leak rate (scfh)	Location (latitude)	Location (longitude)	Equipment (number)	Component	Leak rate (scfh)	Location (latitude)	Location (longitude)	Equipment (number)	Component		Team starting locations
10:30 am - 11:20 am	1	10	4.43	40.5951	-105.139	W(1)	Hand valve packing	7.99	40.596	-105.141	W(3)	Casing flange	9.41	40.5956	-105.14	S(3)	K	3.35	40.5957	-105.139	W(2)	Braden head			Picarro	Heath
11:30 am - 12:20 pm	2	10	1.11	40.5951	-105.14	S(2)	Gage fitting	1.51	40.596	-105.141	W(2)	Pneumatic controller box	0.75	40.5959	-105.14	W(2)	Valve packing - K (lower stem)	0.79	40.5959	-105.139	S(3)	Scrubber (inlet)		Picarro	Heath
1:25 pm - 2:10 pm	3	10	1.47	40.5951	-105.139	S(1)	K vent	1.67	40.5957	-105.141	S(1)	Double K vent	2.93	40.5957	-105.14	S(3)	K valve packing	0.75	40.5956	-105.139	W(1)	Valve body		Picarro	Heath
2:15 pm - 3:00 pm	4	10	0					0					0					0						Heath			Picarro
3:00 pm - 3:45 pm	5	10	0.42	40.5951	-105.139	W(1)	Pressure Gauge	0.55	40.5957	-105.141	S(2)	Pressure gauge	1.72	40.5959	-105.14	W(5)	Threaded connection - pressure gauge	2.02	40.5956	-105.139	W(1)	Braden head		Heath		Picarro
													Quantification Data for Day 1
													Actual	Measured
													scfh	scfh
													4.43	0
													7.99	0
													9.41	3
													3.35	2.6
													1.11	0
													1.51	0.6
													0.75	1.2
													0.79	0.6
													1.47	7.5
													1.67	7.6
													2.93	1.8
													0.75	2.8
													0	0
													0.42	2.2
													0.55	7.9
													1.72	8.2
													2.02	2

## Sheet: Day2_4_10
SINGLE LEAK BINARY DETECTION - YES/NO, 10 MIN/LEAK
Measurement Time Block	Round Number	Time per leak (min)	Pad 1					Pad 2					Pad 3					Pad 4						Pad 1	Pad 2	Pad 3	Pad 4
			Leak rate (scfh)	Location (latitude)	Location (longitude)	Equipment (number)	Component	Leak rate (scfh)	Location (latitude)	Location (longitude)	Equipment (number)	Component	Leak rate (scfh)	Location (latitude)	Location (longitude)	Equipment (number)	Component	Leak rate (scfh)	Location (latitude)	Location (longitude)	Equipment (number)	Component		Team starting locations
9:15 am - 9:54 am	1	10	1.46	40.5951	-105.14	W('2')	Pressure Gauge	6.37	40.5955	-105.141	T(1)	Center roof vent	4.74	40.5959	-105.14	W(3)	Ground leak	3.1	40.596	-105.139	S(1)	Valve flange		Picarro		Heath
10:00 am - 10:40 am	2	10	2.04	40.5951	-105.139	S(1)	Burner fuel sypply	1.58	40.5957	-105.141	S(2)	K vent	2.12	40.5959	-105.14	W(2)	K vent	1.48	40.5959	-105.139	S(3)	Elbow flange		Picarro		Heath
10:57 am - 11:37 am	3	10	0.6	40.5951	-105.14	S('2')	K valve body	0.56	40.5957	-105.141	S(1)	House bottom	1.45	40.5956	-105.14	S(2)	K valve packing	1.84	40.5959	-105.139	S(2)	Control box		Picarro		Heath
1:04 pm - 1:44 pm	4	10	0					0					0					0						Picarro		Heath
1:51 pm - 2:31 pm	5	10	0					0.96	40.5957	-105.141	S(1)	chimney	0					0.67	40.5959	-105.139	S(3)	Valve body		Picarro		Heath
2:44 pm - 3:24 pm	6	10	2.4	40.5951	-105.14	S('2')	Witches hat	0					0					5.67	40.5958	-105.14	T(3)	Thief hatch		Picarro		Heath
3:40 pm - 4:20 pm	7	10	0.46	40.5951	-105.14	S(1)	House PRV	0.65	40.596	-105.141	W(2)	Casing gauge port	0.51	40.5957	-105.14	S(3)	Kimray flange diaphragm	0.47	40.5959	-105.139	S(3)	Valve body		Picarro		Heath
											Quantification Data for Day 2			70% confidence (0.5x - 2x)
												Actual	Measured	Lower limit	Upper limit
												scfh	scfh	scfh	scfh
												1.46	3.78	1.89	7.56
												6.36	3.7	1.85	7.4
												4.74	0.75	0.375	1.5
												3.1	2.43	1.215	4.86
												2.04	5.11	2.555	10.22
												1.58	1.63	0.815	3.26
												2.12	3.43	1.715	6.86
												1.48	3.18	1.59	6.36
												0.6	1.17	0.585	2.34
												0.56	3.34	1.67	6.68
												1.45	1.69	0.845	3.38
												1.84	1.82	0.91	3.64
												0	0	0	0
												0	0	0	0
												0	-	-	-
												0	-	-	-
												0	0	0	0
												0.96	1.91	0.955	3.82
												0	0	0	0
												0.67	5.47	2.735	10.94
												2.4	0	0	0
												0	0	0	0
												0	2.47	1.235	4.94
												5.67	3.88	1.94	7.76
												0.46	1.46	0.73	2.92
												0.65	6.05	3.025	12.1
												0.51	0.94	0.47	1.88
												0.47	1.92	0.96	3.84

## Sheet: Day3_4_11
SINGLE LEAK BINARY DETECTION - YES/NO, 5 MIN/LEAK
Measurement Time Block	Round Number	Time per leak (min)	Pad 1					Pad 2					Pad 3					Pad 4
			Leak rate (scfh)	Location (latitude)	Location (longitude)	Equipment (number)	Component	Leak rate (scfh)	Location (latitude)	Location (longitude)	Equipment (number)	Component	Leak rate (scfh)	Location (latitude)	Location (longitude)	Equipment (number)	Component	Leak rate (scfh)	Location (latitude)	Location (longitude)	Equipment (number)	Component
9:30 am - 9:50 am	1	5
10:04 am - 10:30 am	2	5	1.44	40.5951	-105.139	S(1)	K vent	1.52	40.5957	-105.141	S(1)	Double K vent	3.21	40.5957	-105.14	S(3)	K valve packing	0.71	40.5956	-105.139	W(1)	Valve body
10:35 am - 11:00 am	3	5	2.43	40.5951	-105.14	S('2')	Witches hat	3.27	40.5957	-105.141	S(2)	House PRV	5.84	40.5959	-105.14	S(4)	Hammer union	6.15	40.5958	-105.14	T(3)	Thief hatch
11:05 am - 11:25 am	4	5	1.96	40.5951	-105.139	S(1)	Burner fuel supply	1.54	40.5957	-105.141	S(2)	K vent	2.38	40.5959	-105.14	W(2)	K vent	1.6	40.5959	-105.139		Elbow flange
11:30 am - 11:55 am	5	5	0					0					0					0
1:10 pm - 1:40 pm	6	5	1.43	40.5951	-105.14	W('2')	Pressure Gauge	0					0					3.07	40.596	-105.139	S(3)	Valve flange
1:45 pm - 2:05 pm	7	5	1.91	40.5951	-105.139	S(1)	Burner fuel supply	0					0					1.59	40.5959	-105.139	S(1)	Elbow flange
2:10 pm - 2:30 pm	8	5	0.68	40.5951	-105.14	W('2')	Pneumatic control box	0					0					0.77	40.5957	-105.139	W(2)	K valve body
2:35 pm - 3:00 pm	9	5	0.6	40.5951	-105.14	S('2')	K valve body	0					0					1.9	40.5959	-105.139	S(1)	Control box
3:00 pm - 3:15 pm	10	5	2.82	40.5951	-105.139	T(1)	Thief hatch	5.14	40.5959	-105.141	W(1)	K vent	5.02	40.5956	-105.14	S(3)	K	3.18	40.5957	-105.139	W(2)	Pressure transducer
3:15 pm - 3:25 pm	11	5	0.46	40.5951	-105.14	S(1)	House PRV	0					0					0.47	40.5959	-105.139	S(3)	Valve body
3:25 pm - 3:35 pm	12	5	0.45	40.5951	-105.14	S(1)	House PRV	0					0.57	40.5957	-105.14	S(3)	K flange diaphragm	0
3:35 pm - 3:47 pm	13	5	0.45	40.5951	-105.14	S(1)	House PRV	0.63	40.596	-105.141	W(2)	Casing gauge port	0					0
										Quantification Data for Day 3			70% confidence (0.5x - 2x)
											Actual	Measured	Lower limit	Upper limit
											scfh	scfh	scfh	scfh
											1.52	4.57	2.285	9.14
											3.51	3.16	1.58	6.32

## Sheet: Day4_4_12
UPTO 3 LEAKS/PAD DETECTION AND QUANTIFICATION - 20 MIN/PAD
Measurement Time Block	Round Number	Time per leak (min)	Pad 1					Pad 2					Pad 3					Pad 4
			Leak rate (scfh)	Location (latitude)	Location (longitude)	Equipment (number)	Component	Leak rate (scfh)	Location (latitude)	Location (longitude)	Equipment (number)	Component	Leak rate (scfh)	Location (latitude)	Location (longitude)	Equipment (number)	Component	Leak rate (scfh)	Location (latitude)	Location (longitude)	Equipment (number)	Component
7:20 am - 8:00 am	1	20	2.91	40.5951	-105.139	T (1)	Thief hatch						5.39	40.5959	-105.14	W (3)	Ground leak
			0										0
			0										0
8:10 am - 8:50 am	2	20						0.94	40.5957	-105.141	S (1)	House Bottom						0.59	40.5957	-105.139	W (2)	K valve body
								3.57	40.596	-105.141	W(3)	Casing Flange						1.87	40.5959	-105.139	S (3)	Elbow Flange
								0										0
9:05 am - 9:50 am	3	20						6.6	40.5955	-105.141	T (1)	Center Roof Vent						0.58	40.5959	-105.139	S (3)	Valve body
								2.24	40.596	-105.141	W (3)	Kimray Vent						5.18	40.5957	-105.139	W (2)	Pressure Transducer
								0.29	40.596	-105.141	W(2)	Casing Gauge Port						1.61	40.5956	-105.139	W (1)	Braden Head
9:55 am - 10:40 am	4	20						1.08	40.5957	-105.141	S (1)	Chimney						0.8	40.5959	-105.139	S (3)	Scrubber (inlet)
								0										0
								0										0
10:47 am - 11:35 am	5	20	1.89	40.5951	-105.139	S (1)	K vent						1.62	40.5956	-105.14	S (2)	Kimray valve packing
			0.22	40.5951	-105.139	W (1)	Pressure Gauge						5.9	40.5959	-105.14	W (5)	Threaded Connection - Pressure Gauge
			1.31	40.5951	-105.14	W ('2')	Valve Packing - Shut In Valve							40.5959	-105.14	W (2)	Valve Packing - Kimray (Lower Stem)
11:40 am - 12:40 pm	6	20						1.83	40.5955	-105.141	T (1)	Center Roof Vent	6.16	40.5956	-105.14	S (2)	Kimray top vent
								5.27	40.596	-105.141	W (3)	Kimray Vent	1.77	40.5959	-105.14	W (2)	Kimray Vent
								0					0
ONE LEAK/PAD DETECTION AND QUANTIFICATION - 20 MIN/PAD
1:38 pm - 1:51 pm								0.99	40.5957	-105.141	S (1)	Chimney						0.76	40.5959	-105.139	S (3)	Valve body
1:52 pm - 2:02 pm								0.71	40.596	-105.141	W (2)	Casing Gauge port
1:52 pm - 2:12 pm																		0.73	40.5956	-105.139	W (1)	Valve body
2:03 pm - 2:13 pm								5.18	40.5959	-105.141	W(1)	K vent
2:12 pm - 2:30 pm								0										5.75	40.5958	-105.14	T(3)	Thief Hatch
2:30 pm - 2:40 pm								1.97	40.596	-105.141	W(3)	K vent						0
2:40 pm - 2:50 pm			4.21	40.5951	-105.139	W (1)	Hand valve packing
2:30 pm - 3:00 pm																		1.92	40.5956	-105.139	W (1)	Braden head
2:50 pm - 3:00 pm			1.09	40.5951	-105.14	S ('2')	Gage fitting
3:00 pm - 3:20 pm													0
3:00 pm - 3:30 pm			0
3:25 pm - 3:50 pm													1.61	40.5956	-105.14	S(2)	K valve packing
3:30 pm - 3:40 pm			1.63	40.5951	-105.14	T (1)	Lower NW flange
	Notes	Teams just switch between two pads where leaks are present instead of going around all 4 pads
										Quantification Data for Day 4			70% confidence (0.5x - 2x)
											Actual	Measured	Lower limit	Upper limit
											scfh	scfh	scfh	scfh
											5.39	24.1	12.05	48.2
											0	2.36	1.18	4.72
											2.91	3.23	1.615	6.46
											0	6.8	3.4	13.6
											0.94	1.22	0.61	2.44
											3.57	1.17	0.585	2.34
											0	4.32	2.16	8.64
											0.59	0.31	0.155	0.62
											1.87	0.62	0.31	1.24
											0	0.22	0.11	0.44
											0.58	3.23	1.615	6.46
											5.18	7.26	3.63	14.52
											1.61	2.17	1.085	4.34
											6.6	9.4	4.7	18.8
											2.24	3.85	1.925	7.7
											0.29	1.39	0.695	2.78
											1.08	7.31	3.655	14.62
											0	0	0	0
											0	0.36	0.18	0.72
											0.8	3.38	1.69	6.76
											0	0.46	0.23	0.92
											0	6.26	3.13	12.52
											1.89	2.14	1.07	4.28
											0.22		0	0	combined with above
											1.31	5.27	2.635	10.54
											0	0.32	0.16	0.64
											0	0.32	0.16	0.64
											0	0.84	0.42	1.68
											1.83	1.71	0.855	3.42
											5.27	1.19	0.595	2.38
											0	0.53	0.265	1.06
											6.16	4.36	2.18	8.72
											1.77	4.35	2.175	8.7
											0	0	0	0
											0.76	1.59	0.795	3.18
											0.73	1.37	0.685	2.74
											5.75	3.68	1.84	7.36
											1.92	1.2	0.6	2.4
											1.61	0.04	0.02	0.08
