# Supplementary material for: Single-blind inter-comparison of methane detection technologies – results from the Stanford/EDF Mobile Monitoring Challenge
Source: Oxford University Press journal article supplement (doi:10.1525/elementa.373), 2019-01-01
Supplement: elementa-7-373-s8.xlsx [file elementa-7-373-s8.xlsx]

## Sheet: Read ME
			NOTES
			1	Release rates are in standard cubic feet per hour (scfh)
			2	Gas composition is approximately 87% methane ; Flow rates are given in whole gas flow rate
			3	All times are in local Mountain Time
			4	Release data for each day is given in a separate tab
			5	Example Table data
				Measurement Time Block	Round Number	Time per leak (min)	Leak Number	Pad 1	Pad 2	Pad 3	Pad 4	Pad 5		Pad 1	Pad 2	Pad 3	Pad 4	Pad 5
														Team Locations
				Measurement Time Block		Approximate time interval for measurement in that particular round
				Round Number		Round number for each day where a team stays on the same pad
				Time per leak (min)		Time allotted for measurement (both detection and/or quantification)
				Leak Number		Refers to leak scenarios in a given round on the same pad (Days 1 - 3), or Multiple leaks on the same pad (Day 4)
				Pad 1 - 5		Pad numbers based on the figure below
					Information available for each pad
					Leak rate	Emission rate in standard cubic feet per hour (scfh)
					Latitude	Latitude coordinates for the emission source
					Longitude	Longitude coordinate for the emission source
					Equipment	Equipment group (W: well-head, S: separator, T: tank) and number (given in parenthesis as a number, identified west to east in the picture below)
					Component	Emitting component
				Team locations		Location of each team for the given round
			6	Day 5: All teams were given the same leak scenario across the entire facility
			7	Cell Shading Guidelines
					Type	Definition			Shading of each Pad Information
					Level-1 detection	Team correctly identifies equipment group and equipment number			Equipment - Green; Component - Green
					Level-2 detection	Team correctly identifies equipment group but wrong equipment number			Equipment - Red; Component - Green
					Level-3 detection	Team mis-identifies equipment group or does not identify any emission			Equipment - Red; Component - Red
			9	All leaks can be assumed to be steady state value, with an error of +/- 5% (upper limit)
			10	Legend (components)	K	Kimray
			11	All equipments are numbered from left to right (west to east) in scenarios where there are multiple equipment of the same group
			12	Grayed out cells refer to tests that a particular team did not participate in (other teams were on that pad)

## Sheet: Day1_5_7
SINGLE LEAK BINARY DETECTION - YES/NO, 10 MIN/LEAK
Measurement Time Block	Round Number	Time per leak (min)	Leak Number	Pad 1					Pad 2					Pad 3					Pad 4					Pad 5						Pad 1	Pad 2	Pad 3	Pad 4	Pad 5
				Leak rate (scfh)	Location (latitude)	Location (longitude)	Equipment (number)	Component	Leak rate (scfh)	Location (latitude)	Location (longitude)	Equipment (number)	Component	Leak rate (scfh)	Location (latitude)	Location (longitude)	Equipment (number)	Component	Leak rate (scfh)	Location (latitude)	Location (longitude)	Equipment (number)	Component	Leak rate (scfh)	Location (latitude)	Location (longitude)	Equipment (number)	Component		Team Locations
10:16 am - 10:28 am	1	10	1	0					0					3	40.5957	-105.141	S (2)	House-PRV	1.8	40.5957	-105.14	S (3)	K-valve	0.9	40.5956	-105.139	W (1)	Valve body		BHGE	Seek Ops	Aeris	ABB/ULC	Advisian
10:35 am - 10:45 am			2	5	40.5951	-105.139	S	Low pressure PRV	10.2	40.5951	-105.14	W	Kimray Vent	0					0					11	40.5956	-105.139	W (1)	Braden head
10:50 am - 11:00 am			3	0					0					0					0					0
11:24 am - 11:34 am	2	10	1	0.6	40.5951	-105.14	S	House-PRV	1.4	40.5951	-105.14	S	Kimray Valve	0					0					0	40.5959	-105.139	S (3)	Valve body		Advisian	BHGE	Seek Ops	Aeris	ABB/ULC
11:41 am - 11:51 am			2	0					4.4	40.5951	-105.14	S	Witches Hat	8.5	40.5955	-105.141	T (1)	Center Roof Vent	0					0
11:58 am - 12:08 am			3	0					0					0.7	40.596	-105.141	W (1)	Regulator	2.9			T (?)	Header	2.5	40.5959	-105.139	S (2)	Control Box
1:45 pm - 1:55 pm	3	10	1	0					0					1.4	40.596	-105.141	W (3)	Casing Flange	2.4	40.5957	-105.14	S (3)	K-Flange Diaphragm	8.5	40.5959	-105.139	S (2)	Control Box		ABB/ULC	Advisian	BHGE	Seek Ops	Aeris
2:03 pm - 2:13 pm			2	1.3	40.5951	-105.139	S	Burner fuel supply	0.8	40.5951	-105.14	W	Pneumatic Control Box	2	40.5957	-105.141	S (2)	Kimray Vent	0					0
2:20 pm - 2:30 pm			3	0					0					0					0					0
2:48 pm - 2:58 pm	4	10	1	0.6	40.5951	-105.139	W	Pressure gauge	0					3	40.596	-105.141	W (1)	Regulator	5.2	40.5957	-105.14	S (3)	K-Flange Diaphragm	0						Aeris	ABB/ULC	Advisian	BHGE	Seek Ops
3:01 pm - 3:11 pm			2	0					0					0.7	40.5957	-105.141	S (2)	Pressure Gauge	4.7	40.5959	-105.14	W (2)	K-V packing	4.7	40.5959	-105.139	S (3)	Valve body
3:20 pm - 3:30 pm			3	0					3	40.5951	-105.14	S	Witches Hat	4.2	40.5957	-105.141	S (2)	House PRV	6.8	40.5959	-105.14	W (4)	Hammer Union	7.3	40.596	-105.139	S (1)	Valve flange

## Sheet: Day2_5_8
Measurement Time Block	Round Number	Time per leak (min)	Leak Number	Pad 1					Pad 2					Pad 3					Pad 4					Pad 5						Pad 1	Pad 2	Pad 3	Pad 4	Pad 5
				Leak rate (scfh)	Location (latitude)	Location (longitude)	Equipment (number)	Component	Leak rate (scfh)	Location (latitude)	Location (longitude)	Equipment (number)	Component	Leak rate (scfh)	Location (latitude)	Location (longitude)	Equipment (number)	Component	Leak rate (scfh)	Location (latitude)	Location (longitude)	Equipment (number)	Component	Leak rate (scfh)	Location (latitude)	Location (longitude)	Equipment (number)	Component		Team Locations
SINGLE LEAK BINARY DETECTION - YES/NO, 10 MIN/LEAK
9:26 am - 9:36 am	1	10	1	0.6	40.5951	-105.139	W	Pressure Gauge	3	40.5951	-105.14	S	Witches Hat	0.7	40.5957	-105.141	S (2)	Pressure Gauge	2.6	40.5959	-105.14	W (4)	Hammer Union	3.4	40.5958	-105.14	T (3)	Thief Hatch		Seek Ops	Aeris	ABB/ULC	Advisian	BHGE
9:43 am - 9:53 am			2	0					0					0.7	40.5957	-105.141	S (2)	Pressure Gauge	1.8	40.5957	-105.14	S (3)	Kimray Flange Diaphragm	1.2	40.5959	-105.139	S (3)	Valve Body
9:59 am - 10:10 am			3	0.6	40.5951	-105.139	W	Pressure Gauge	2.9	40.5951	-105.14	W	Pneumatic Control Box	0					0					3.9	40.5959	-105.139	S (3)	Valve Body
10:23 am - 10:33 am	2	10	1	0					0					1.2	40.5955	-105.141	T (1)	Center Roof Vent	9.1	40.5959	-105.14	W (2)	Kimray Vent	9	40.596	-105.139	S (1)	Valve Flange		BHGE	Seek Ops	Aeris	ABB/ULC	Advisian
10:38 am - 10:48 am			2	0					1.4	40.5951	-105.14	S	Witches Hat	3.7	40.5955	-105.141	T (1)	Center Roof Vent	0					0
10:54 am - 11:05 am			3	0.6	40.5951	-105.14	S	House PRV	1.4	40.5951	-105.14	S	Kimray Valve Body	0					0					1.2	40.5959	-105.139	S (3)	Valve Body
11:32 am - 11:42 am	3	10	1	2.6	40.5951	-105.139	S	Burner fuel supply	0					4.2	40.5957	-105.141	S (2)	House PRV	6.7	40.5959	-105.14	W (4)	Hammer Union	7.3	40.596	-105.139	S (1)	Valve Flange		Advisian	BHGE	Seek Ops	Aeris	ABB/ULC
11:47 am - 11:57 am			2	1.3	40.5951	-105.139	S	Burner fuel supply	0.8	40.5951	-105.14	W	Pneumatic Control Box	2	40.5957	-105.141	S (2)	Kimray Vent	0					0
12:03 pm - 12:13 pm			3	0					0					1.3	40.5957	-105.141	S (2)	House PRV	0.9	40.5959	-105.14	W (2)	Valve Packing - Kimray (Lower Stem)	2.3	40.5959	-105.139	S (2)	Control Box
SINGLE LEAK BINARY DETECTION - YES/NO, 5 MIN/LEAK + 1 MIN/LEAK SET UP
1:39 pm - 1:45 pm	4	5	1	0					0					0.6	40.596	-105.141	W (1)	Regulator	2.4	40.5957	-105.14	S (3)	Kimray Flange Diaphragm	2.3	40.5959	-105.139	S (2)	Control Box		ABB/ULC	Advisian	BHGE	Seek Ops	Aeris
1:48 pm - 1:54 pm			2	0.6	40.5951	-105.139	W	Pressure Gauge	2.9	40.5951	-105.14	S	Witches Hat	0.7	40.5957	-105.141	S (2)	Pressure Gauge	2.7	40.5959	-105.14	W (4)	Hammer Union	3.3	40.5958	-105.14	T (3)	Thief Hatch
2:00 pm - 2:06 pm			3	0					0					0.6	40.5957	-105.141	S (2)	Pressure Gauge	4.6	40.5959	-105.14	W (2)	Valve Packing - Kimray (Lower Stem)	4.6	40.5959	-105.139	S (3)	Valve Body
2:12 pm - 2:18 pm			4	0					0					0					0					0
2:35 pm - 2:41 pm	5	5	1	2.6	40.5951	-105.139	S	Burner fuel supply	0					4.1	40.5957	-105.141	S (2)	House PRV	6.6	40.5959	-105.14	W (4)	Hammer Union	7.2	40.596	-105.139	S (1)	Valve Flange		Aeris	ABB/ULC	Advisian	BHGE	Seek Ops
2:48 pm - 2:54 pm			2	1.3	40.5951	-105.139	S	Burner fuel supply	0.8	40.5951	-105.14	W	Pneumatic Control Box	2	40.5957	-105.141	S (2)	Kimray Vent	0					0
3:04 pm - 3:10 pm			3	0					0					0.7					4.1					3.9
3:17 pm - 3:23 pm			4	0					1.9	40.5951	-105.14	S	PRV	2	40.5957	-105.141	S (1)	Double Kimray Vent	3.5	40.5957	-105.14	S (3)	Kimray valve packing	0.5	40.5956	-105.139	W (1)	Valve Body
3:39 pm - 3:45 pm	6	5	1	2.6	40.5951	-105.139	S	Burner fuel supply	4.1	40.5951	-105.14	S	Witches Hat	6.6	40.5957	-105.141	S (2)	House PRV	5.9	40.5959	-105.14	W (4)	Hammer Union	0						Seek Ops	Aeris	ABB/ULC	Advisian	BHGE
3:50 pm - 3:56 pm			2	0					0					0.6	40.596	-105.141	W (1)	Regulator	2.4	40.5957	-105.14	S (3)	Kimray Flange Diaphragm	2.3	40.5959	-105.139	S (2)	Control Box
4:03 pm - 4:09 pm			3	1.6	40.5951	-105.139	W	Lubricator Flange	0					0					2.4	40.5957	-105.14	S (3)	Kimray Flange Diaphragm	8.3	40.5959	-105.139	S (2)	Control Box
4:15 pm - 4:21 pm			4	2.4	40.5951	-105.139	W	Hand valve packing	5.2	40.5951	-105.14	S	Kimray (small) vent	1.5	40.5957	-105.141	S (2)	Pressure Gauge	0					0
											Quantification data for day 2
											Actual	Measured
											scfh	scfh
											3.4	1.2
											1.2	0.189
											3.9	0.716
											0	0.99
											0	0.169
											0.6	0.751
											0	2.64
											0.8	0.658
											0.6	6.25
											0.7	3.65
											0.6	2.01
											0	0.421
											6.6	2.93
											0	6.89
											4.1	2.95
											3.5	4.16
											0	0.25
											2.3	0.34
											8.3	0.864
											0	0.267

## Sheet: Day3_5_9
Measurement Time Block	Round Number	Time per leak (min)	Leak Number	Pad 1					Pad 2					Pad 3					Pad 4					Pad 5						Pad 1	Pad 2	Pad 3	Pad 4	Pad 5
				Leak Rate (scfh)	Location (latitude)	Location (longitude)	Equipment (number)	Component	Leak Rate (scfh)	Location (latitude)	Location (longitude)	Equipment (number)	Component	Leak Rate (scfh)	Location (latitude)	Location (longitude)	Equipment (number)	Component	Leak Rate (scfh)	Location (latitude)	Location (longitude)	Equipment (number)	Component	Leak Rate (scfh)	Location (latitude)	Location (longitude)	Equipment (number)	Component		Team Locations
SINGLE LEAK BINARY DETECTION - YES/NO, 5 MIN/LEAK
9:05 am - 9:11 am	1	5	1	0.6	40.5951	-105.139	W	Pressure Gauge	3	40.5951	-105.14	S	Witches Hat	0.7	40.5957	-105.141	S (2)	Pressure Gauge	2.6	40.5959	-105.14	W (4)	Hammer Union	3.4	40.5958	-105.14	T (3)	Thief Hatch		BHGE	Advisian	Aeris	ABB/ULC	Seek Ops
9:16 am - 9:22 am			2	0.6	40.5951	-105.139	W	Pressure Gauge	2.9	40.5951	-105.14	W	Pressure Control Box	3.8	40.5957	-105.141	S (2)	Pressure Gauge	0					0
9:30 am - 9:36 am			3	0					0					0.7	40.5957	-105.141	S (2)	Pressure Gauge	1.8	40.5957	-105.14	S (3)	Kimray Flange Diaphragm	1.2	40.5959	-105.139	S (3)	Valve body
9:40 am - 9:46 am			4	2.4	40.5951	-105.139	W	Hand valve packing	0					0					1	40.5956	-105.14	S (3)	Kimray	0.3	40.5959	-105.139	S (3)	Valve body
10:08 am - 10:14 am	2	5	1	1.6	40.5951	-105.139	W	Lubricator flange	0					2.3	40.5957	-105.141	S (2)	Pressure Gauge	1.2	40.5956	-105.14	S (3)	Kimray	0						Seek Ops	BHGE	Advisian	Aeris	ABB/ULC
10:16 am - 10:22 am			2	0					0					0					0					0
10:28 am - 10:34 am			3	0.6	40.5951	-105.139	W	Pressure Gauge	2.9	40.5951	-105.14	S	Witches Hat	4.1	40.5957	-105.141	S (2)	House PRV	6.6	40.5959	-105.14	W (4)	Hammer Union	7.8	40.5958	-105.14	T (3)	Thief Hatch
10:41 am - 10:47 am			4	0.6	40.5951	-105.139	W	Pressure Gauge	5	40.595	-105.14	T	Thief hatch	2	40.5957	-105.141	S (2)	Kimray vent	0					0
11:01 am - 11:07 am	3	5	1	0.6	40.5951	-105.139	W	Pressure Gauge	0					3	40.596	-105.141	W (1)	Regulator	5.1	40.5957	-105.14	S (3)	Kimray Flange Diaphragm	0						ABB/ULC	See	BHGE	Advisian	Aeris
11:14 am - 11:20 am			2	1.9	40.5951	-105.139	S	Kimray vent	2	40.5951	-105.14	W	Casing ball valve	2.8	40.5957	-105.141	S (2)	House PRV	0					0.5	40.5956	-105.139	S (3)	Valve body
11:25 am - 11:31 am			3	0.6	40.5951	-105.139	W	Pressure Gauge	2.9	40.5951	-105.14	W	Pneumatic control box	0					0					3.9	40.5959	-105.139	S (3)	Valve body
11:38 am - 11:44 am			4	0					0					2	40.596	-105.141	W (3)	Kimray vent	1.2	40.5956	-105.14	S (3)	Kimray	0.4	40.5959	-105.139	S (3)	Valve body
SINGLE LEAK QUANTIFICATION - 20 MIN/LEAK
1:08 pm - 1:28 pm	4	20	1	0.6	40.5951	-105.139	W	Pressure Gauge	2.9	40.5951	-105.14	S	Witches Hat	4	40.5957	-105.141	S (2)	House PRV	6.6	40.5959	-105.14	W (4)	Hammer Union	7.8	40.5958	-105.14	T (3)	Thief Hatch		Aeris	ABB/ULC	Seek Ops	BHGE	Advisian
1:34 pm - 1:54 pm			2	0.6	40.5951	-105.139	W	Pressure Gauge	2.9	40.5951	-105.14	S	Witches Hat	0.6	40.5957	-105.141	S (2)	Pressure Gauge	2.6	40.5959	-105.14	W (4)	Hammer Union	3.3	40.5958	-105.14	T (3)	Thief Hatch
2:05 pm - 2:25 pm	5	20	1	5.7	40.5951	-105.139	S	Burner fuel supply	6.9	40.5951	-105.14	W	Kimray Vent	5	40.5957	-105.141	S (2)	Kimray vent	0					0						Advisian	Aeris	ABB/ULC	Seek Ops	BHGE
2:30 pm - 2:50 pm			2	0					0					1.3	40.596	-105.141	W (3)	Casing flange	2.4	40.5957	-105.14	S (3)	Kimray Flange Diaphragm	8.3	40.5959	-105.139	S (2)	Control box
2:58 pm - 3:18 pm	6	20	1	2.6	40.5951	-105.139	S	Burner fuel supply	2.8	40.5951	-105.14	W	Kimray flange	1.9	40.5957	-105.141	S (2)	Kimray vent	2.6	40.5959	-105.14	W (2)	Kimray Vent	1.8	40.5959	-105.139	S (3)	Elbow Flange		BHGE	Advisian	Aeris	ABB/ULC	Seek Ops
3:24 pm - 3:44 pm			2	0.6	40.5951	-105.139	W	Pressure Gauge	0					3	40.596	-105.141	W (1)	Regulator	5.1	40.5957	-105.14	S (3)	Kimray Flange Diaphragm	0
3:51 pm - 4:11 pm	7	20	1	2.6	40.5951	-105.139	S	Burner fuel supply	0					4.1	40.5957	-105.141	S (2)	House PRV	6.6	40.5959	-105.14	W (4)	Hammer Union	7.2	40.596	-105.139	S (1)	Valve flange		Seek Ops	BHGE	Advisian	Aeris	ABB/ULC
4:16 pm - 4:36 pm			2	0					1.5	40.5951	-105.14	W	Kimray Flange	2.2	40.5957	-105.141	S (2)	Pressure Gauge	0					8.3	40.5959	-105.139	S (2)	Control box
											Quantification data for day 3
											Actual	Measured
											scfh	scfh
											0.6	0.464
											0.6	0
											0	0.225
											2.4	0.138
											0	0.157
											0	1.84
											2.9	0
											5	0
											3	0.309
											2.8	0
											0	0
											2	0
											6.6	0.648
											2.6	2.96
											0	0.655
											8.3	0.356
											2.6	0.344
											0.6	0
											0	1.02
											1.5	0

## Sheet: Day4_5_10
Measurement Time Block	Round Number	Time per scenario (min)	Leak Number	Pad 1					Pad 2					Pad 3					Pad 4					Pad 5						Pad 1	Pad 2	Pad 3	Pad 4	Pad 5
				Leak Rate (scfh)	Location (latitude)	Location (longitude)	Equipment (number)	Component	Leak Rate (scfh)	Location (latitude)	Location (longitude)	Equipment (number)	Component	Leak Rate (scfh)	Location (latitude)	Location (longitude)	Equipment (number)	Component	Leak Rate (scfh)	Location (latitude)	Location (longitude)	Equipment (number)	Component	Leak Rate (scfh)	Location (latitude)	Location (longitude)	Equipment (number)	Component		Team Locations
MULTI-LEAK QUANTIFICATION - Upto 3 leaks/pad
9:23 am - 9:43 am	1a	20	1	0.6	40.5951	-105.139	W	Pressure gauge	0.8	40.5951	-105.14	W	Pneumatic control box	2.3	40.5957	-105.141	S (2)	Pressure gauge	5.3	40.5957	-105.14	S (3)	Kimray valve packing	5.7	40.596	-105.139	S (1)	Valve flange		ABB/ULC	Seek Ops	BHGE	Advisian	Aeris
			2	1.3	40.5951	-105.139	S	Burner fuel supply	1.4	40.5951	-105.14	S	Witches hat	7.2	40.596	-105.141	W (3)	Kimray vent	0					0
			3	3	40.5951	-105.139	T	Thief hatch	5.2	40.5951	-105.14	S	Kimray (small) vent	0					0					0
9:55 am - 10:15 am	1b	20	1	9.6	40.5951	-105.139	W	Lubricator flange	8.4	40.5951	-105.14	S	Kimray (small) vent	2.8	40.5957	-105.141	S (2)	House PRV	6.5	40.5956	-105.14	S (2)	Kimray valve packing	0.9	40.5959	-105.139	S (3)	Scrubber (inlet)
			2	0					1.5	40.5951	-105.14	W	Kimray flange	0					4.6	40.5959	-105.14	W (3)	Valve packing - shut in valve	0
			3	0					0					0					0					0
10:29 am - 10:50 am	2a	20	1	4.9	40.5951	-105.139	S	Low pressure PRV	0.8	40.5951	-105.14	W	Pneumatic control box	1.6	40.5957	-105.141	S (1)	House bottom	3.5	40.5957	-105.14	S (3)	Kimray valve packing	0.9			T	Header		Aeris	ABB/ULC	Seek Ops	BHGE	Advisian
			2	0					9.4	40.5951	-105.14	W	Kimray flange	2	40.596	-105.141	W (3)	Kimray vent	0					0
			3	0					0					0					0					0
11:00 am - 11:20 am	2b	20	1	1.3	40.5951	-105.139	S	Burner fuel supply	1.4	40.5951	-105.14	S	Witches hat	2.3	40.5957	-105.141	S (2)	Pressure gauge	5.6	40.5957	-105.14	S (3)	Kimray valve packing	5.7	40.596	-105.139	S (1)	Valve flange
			2	3	40.5951	-105.139	T	Thief hatch	5.1	40.5951	-105.14	S	Kimray (small) vent	7.2	40.596	-105.141	W (3)	Kimray vent	0					0
			3	0.6	40.5951	-105.139	W	Pressure gauge	0.8	40.5951	-105.14	W	Pneumatic control box	0					0					0
11:30 am - 11:50 am	3a	20	1	0					0					2.9	40.5957	-105.141	S (2)	Pressure Gauge	1.3	40.5956	-105.14	S (3)	Kimray	10.6	40.596	-105.139	S (1)	Valve flange		Advisian	Aeris	ABB/ULC	Seek Ops	BHGE
			2	0					0					4.4	40.5955	-105.141	T (2)	Thief Hatch	4.6	40.5959	-105.14	W (2)	Valve Packing - Kimray (Lower Stem)	0
			3	0					0					1.7	40.596	-105.141	W (3)	Kimray Vent	0					0
12:04 pm - 12:24 pm	3b	20	1	2.1	40.5951	-105.14	S	House PRV	0.7	40.5951	-105.14	S	Kimray Valve Body	6.1	40.596	-105.141	W (2)	Pneumatic control box	0					0
			2	6.5	40.5951	-105.139	W	Kimray packing	1.9	40.5951	-105.14	S	Kimray (small) Vent	0					0					0
			3	0					1.4	40.5951	-105.14	W	Valve Packing - Shut In Valve	0					0					0
1:45 pm - 2:05 pm	4a	20	1	9.4	40.5951	-105.139	W	Lubricator flange	8.2	40.5951	-105.14	S	Kimray (small) Vent	2.7	40.5957	-105.141	S (2)	House PRV	6.4	40.5956	-105.14	S (2)	Kimray valve packing	0.8	40.5959	-105.139	S (3)	Scrubber (inlet)		BHGE	Advisian	Aeris	ABB/ULC	Seek Ops
			2	0					1.5	40.5951	-105.14	W	Kimray Flange	0					4.6	40.5959	-105.14	W (3)	Valve Packing - Shut In Valve	0
			3	0					0					0					0					0
2:13 pm - 2:33 pm	4b	20	1	4.8	40.5951	-105.139	S	Low pressure PRV	0.8	40.5951	-105.14	W	Pneumatic Control Box	1.6	40.5957	-105.141	S (1)	House Bottom	3.4	40.5957	-105.14	S (3)	Kimray valve packing	0.9			T	Header
			2	0					9.3	40.5951	-105.14	W	Kimray Flange	1.9	40.596	-105.141	W (3)	Kimray Vent	0					0
			3	0					0					0					0					0
2:47 pm - 3:07 pm	5a	20	1	1.3	40.5951	-105.139	S	Burner Fuel Supply	1.4	40.5951	-105.14	S	Witches Hat	2.3	40.5957	-105.141	S (2)	Pressure gauge	5.4	40.5957	-105.14	S (3)	Kimray valve packing	5.6	40.596	-105.139	S (1)	Valve flange		Seek Ops	BHGE	Advisian	Aeris	ABB/ULC
			2	3	40.5951	-105.139	T	Thief Hatch	5.1	40.5951	-105.14	S	Kimray (small) Vent	7.1	40.596	-105.141	W (3)	Kimray vent	0					0
			3	0.6	40.5951	-105.139	W	Pressure Gauge	0.8	40.5951	-105.14	W	Pneumatic Control Box	0					0					0
3:18 pm - 3:38 pm	5b	20	1	0.6	40.5951	-105.14	S	House PRV	5	40.5951	-105.14	W	Pneumatic control box	0					0					2.5	40.5959	-105.139	S (2)	Pressure Relief Valve
			2	4.8	40.5951	-105.139	W	Kimray Packing	0					0					0					5.1	40.5957	-105.139	W (2)	Braden head
			3	0					0					0					0					0
3:46 pm - 4:06 pm	6a	20	1	0					0					2.2	40.5957	-105.141	S (2)	Pressure Gauge	0.5	40.5957	-105.14	S (3)	Kimray Flange Diaphragm	1	40.5959	-105.139	S (3)	Valve Body		ABB/ULC	Seek Ops	BHGE	Advisian	Aeris
			2	0					0					6.1	40.596	-105.141	W (2)	Pneumatic Control Box	1.4	40.5956	-105.14	S (3)	Kimray	6.7	40.5957	-105.139	W (2)	Pressure Transducer
			3	0					0					0					1.9	40.5959	-105.14	W (3)	Ground Leak	0
4:25 pm - 4:45 pm	6b	20	1	1.3	40.5951	-105.139	S	Burner Fuel Supply	1.4	40.5951	-105.14	S	Witches Hat	2.2	40.5957	-105.141	S (2)	Pressure Gauge	0					0
			2	3	40.5951	-105.139	T	Thief Hatch	5.1	40.5951	-105.14	S	Kimray (small) Vent	7	40.596	-105.141	W (3)	Kimray Vent	0					0
			3	0.6	40.5951	-105.139	W	Pressure Gauge	0.8	40.5951	-105.14	W	Pneumatic Control Box	0					0					0
											Quantification data for day 4
											Actual	Measured
											scfh	scfh
											2.3	1.34
											7.2	0.815
											0	0.046
											2.8	2.81
											0	0.387
											0	0.386
											3.5	3.63
											0	0.414
											0	0.479
											5.6	3.11
											0	0.303
											0	0.795
											10.6	3.49
											0	0.659
											0	0
											0	0.184
											0	0.807
											0	0
											9.4	0.144
											0	0.056
											0	0
											4.8	1.3
											0	0
											0	0
											1.4	0
											5.1	0.171
											0.8	0
											5	0.059
											0	0
											0	0
											2.2	0.058
											6.1	0.442
											0	0
											2.2	0
											7	0
											0	0

## Sheet: Day5_5_11
FULL FACILITY LEAK DETECTION AND QUANTIFICATION - 45 MIN/TEAM
	Pad 1					Pad 2					Pad 3					Pad 4					Pad 5
	Leak Rate (scfh)	Location (latitude)	Location (longitude)	Equipment (number)	Component	Leak Rate (scfh)	Location (latitude)	Location (longitude)	Equipment (number)	Component	Leak Rate (scfh)	Location (latitude)	Location (longitude)	Equipment (number)	Component	Leak Rate (scfh)	Location (latitude)	Location (longitude)	Equipment (number)	Component	Leak Rate (scfh)	Location (latitude)	Location (longitude)	Equipment (number)	Component
	0					1.44	40.5951	-105.14	W	Kimray flange	1.2	40.5955	-105.141	T	Center roof vent	8	40.5956	-105.14	S (2)	Kimray valve packing	1.1	40.5959	-105.139	S (3)	Valve Body
	0					0					0					0.5	40.5957	-105.14	S (2)	House Regulator	2.3	40.5959	-105.139	S (2)	Control Box
	0					0					0					0					1.8	40.596	-105.139	S (1)	Valve Flange
											Quantification data for day 5
											Actual	Measured
											scfh	scfh
											0	0
											1.44	0
											1.2	0.789
											0	5.35
											8	2.83
											0.5	0
											1.1	0.817
											2.3	6.45
											1.8	0
