# Supplementary material for: Single-blind inter-comparison of methane detection technologies – results from the Stanford/EDF Mobile Monitoring Challenge
Source: Oxford University Press journal article supplement (doi:10.1525/elementa.373), 2019-01-01
Supplement: elementa-7-373-s10.xlsx [file elementa-7-373-s10.xlsx]

## Sheet: ReadME
			NOTES
			1	Release rates are in standard cubic feet per hour (scfh)
			2	Gas composition is approximately 91% methane ; Flow rates are given in whole gas flow rate
			3	All times are in local Pacific Standard Time
			4	Release data for each day is given in a separate tab
			5	Example Table data
				Measurement Time Block	Round Number	Source 1	Source 2	Source 3	Temperature	Measurement Teams
				Measurement Time Block		Approximate time interval for measurement in that particular round
				Round Number		Round number for each day
				Source 1 - 3		Source location (see image below)
				Temperature		Gas temperature at the location of the flow meters in degrees Farenheit
				Measurement Teams		Teams measuring in a particular round
					B	Ball Aerospace
					C	University of Calgary Truck
					Drone	University of Calgary Drone
			6	Cell shading guidelines
					Green	Leak correctly identified
					Red	Incorrect leak identification (either false positive or false negative)

## Sheet: Day1_5_21
SINGLE LEAK BINARY DETECTION: YES/NO 10 MIN/LEAK
Measurement Time Block	Round Number	Source 1	Source 2	Source 3	Temperature	Measurement Teams
8:32 am - 8:42 am	1	75	0	0	64	B/C
8:48 am - 8:58 am	2	0	160	0	65	B/C
9:03 am - 9:13 am	3	0	0	118	70	B
9:18 am - 9:28 am	4	0	288	0	69	B/C
9:33 am - 9:43 am	5	0	0	0		B
9:48 am - 9:58 am	6	0	390	0	75	B/C
10:03 am - 10:13 am	7	0	0	65	75	B/C
10:18 am - 10:28 am	8	140	0	0	71	B/C
10:33 am - 10:43 am	9	0	0	285	76	B
10:48 am - 10:58 am	10	0	155	0	73	B/C
11:03 am - 11:13 am	11	420	0	0	78	B/C
11:18 am - 11:28 am	12	0	72	0	76	B/C
2:51 pm - 3:01 pm	13	0	125	0	84	C
3:05 pm - 3:15 pm	14	0	0	120	85	C
3:20 pm - 3:35 pm	15	0	200	0	84	C
3:35 pm - 3:45 pm	16	0	0	244	83	C
3:50 pm - 4:00 pm	17	74	0	0	86	C

## Sheet: Day2_5_22
SINGLE LEAK BINARY DETECTION: YES/NO 10 MIN/LEAK
Measurement Time Block	Round Number	Source 1	Source 2	Source 3	Temperature	Measurement Teams
8:25 am - 8:35 am	1	315	0	0	63	B/C
8:40 am - 8:50 am	2	0	430	0	62	B/C
8:55 am - 9:05 am	3	0	590	0	63	B/C
9:10 am - 9:20 am	4	0	0	570	65	B/C
9:25 am - 9:35 am	5	800	0	0	64	B/C
9:40 am - 9:50 am	6	0	310	0	65	B/C
9:55 am - 10:05 am	7	0	0	0		B/C	Control data: Both teams told of zero release
10:10 am - 10:20 am	8	190	0	0	71	B
10:25 am - 10:35 am	9	0	410	0	73	B/C
10:40 am - 10:50 am	10	0	0	210	75	B/C
10:55 am - 11:05 am	11	0	110	0	74	C
11:10 am - 11:20 am	12	0	42	0	75	C
SINGLE LEAK DETECTION AND QUANTIFICATION - 25 MIN/LEAK (only UC Truck)
Long distance measurements
1:35 pm - 1:50 pm	13	Background measurements; No releases				C
1:55 pm - 2: 20 pm	14	0	0	800	82	C
2:25 pm - 2:40 pm	15	0	200	0	84
2:50 pm - 3:25 pm	16	0	0	440	82	C
3:40 pm - 4:05 pm	17	0	0	780	84	C

## Sheet: Day3_5_23
SINGLE LEAK DETECTION/QUANTIFICATION
Measurement Time Block	Round Number	Source 1	Source 2	Source 3	Temperature	Measurement Teams
8:25 am - 8:45 am	1	0	560	0	65	Drone
8:55 am - 9:10 am	2	0	720	0	63	Drone
9:15 am - 9:30 am	3	1240	0	0	63	Drone
9:35 am - 9:50 am	4	1450	0	0	65	Drone
10:55 am - 11:05 am	5	0	800	0	71	B
11:08 am - 11:23 am	6	1225	0	0	70	B/Drone
11:28 am - 11:43 am	7	0	540	0	73	B/Drone
11:48 am - 12:03 pm	8	1400	0	0	72	B/Drone
12:08 pm - 12:23 pm	9	0	780	0	73	B/Drone
12:28 pm - 12:38 pm	10	0	0	320	74	B
											Quantification data for day 3
SINGLE LEAK DETECTION: 5 MIN/LEAK (only UC Truck)											Actual (scfh)	Measured (scfh)	Lower bound	Upper bound
2:25 pm - 2:30 pm	1	244	0	0	76	C					800	300	150	450
2:35 pm - 2:40 pm	2	0	130	0	78	C					1225	450	225	675
2:45 pm - 2:50 pm	3	0	0	340	76	C					540	300	150	450
2:55 pm - 3:00 pm	4	0	0	0	84	C					1400	350	175	525
3:05 pm - 3:10 pm	5	75	0	0	79	C					780	300	150	450
3:15 pm - 3:20 pm	6	515	0	0	75	C					320	0	0	0
3:25 pm - 3:30 pm	7	0	240	0	76	C
3:35 pm - 3:40 pm	8	130	0	0	78	C
3:45 pm - 3:50 pm	9	0	510	0	76	C
3:55 pm - 4:00 pm	10	0	0	0		C
4:05 pm - 4:10 pm	11	0	75	0	78	C
4:15 pm - 4:20 pm	12	340	0	0	76	C

## Sheet: Day4_5_24
MULTI-LEAK QUANTIFICATION: 15 MIN/LEAK
Measurement Time Block	Round Number	Source 1	Source 2	Source 3	Temperature			Measurement Teams
					Source 1	Source 2	Source 3
8:20 am - 8:35 am	1	200	230	0	70	70		B/C			Quantification for day 4
8:40 am - 8:55 am	2	0	50	440		72	73	B/C			Actual	Measured	Lower bound	Upper bound
9:00 am - 9:15 am	3	140	130	130	73	73	78	B/C			(scfh)
9:20 am - 9:35 am	4	460	0	0	77			B/C			200	500	150	750
9:40 am - 9:55 am	5	520	0	150	77		81	B/C			230	350	175	525
10:00 am - 10:15 am	6	0	610	0		76		B/C			0	0	0	0
10:20 am - 10:35 am	7	200	200	520	76	76	77	B/C			0	0	0	0
10:40 am - 10:55 am	8	0	0	0				B/C			50	50	25	75	estimated by viewer on the plane (too small to accurately measure)
11:00 am - 11:15 am	9	110	320	0	79	81		B/C			440	700	350	1050
11:20 am - 11:35 am	10	0	0	400			84	B/C			140	100	50	150	estimated by viewer on the plane (too small to accurately measure)
11:40 am - 11:55 am	11	680	145	0	83	81		B/C			130	100	50	150	estimated by viewer on the plane (too small to accurately measure)
12:00 pm - 12:15 pm	12	150	620	155	81	80	85	B/C			130	0	0	0
12:20 pm - 12:35 pm	13	140	0	135	80		87	B/C			460	550	275	825
											520	700	350	1050
2:30 pm - 2:50 pm	1	Baseline measurements						C			150	100	50	150	estimated by viewer on the plane (too small to accurately measure)
3:00 pm - 3:15 pm	2	300	190	0	84	85		C			610	350	175	525
3:20 pm - 3:35 pm	3	610	0	160	81		84	C			200	200	100	300
3:40 pm - 3:55 pm	4	0	240	0		84		C			200	100	50	150	estimated by viewer on the plane (too small to accurately measure)
4:00 pm - 4:15 pm	5	500	100	300	81	84	80	C			520	100	50	150	estimated by viewer on the plane (too small to accurately measure)
											110	450	225	675
												50	25	75	estimated by viewer on the plane (too small to accurately measure)
												650	325	975
												1000	500	1500
												1100	550	1650
												200	0	400	estimated by viewer on the plane (too small to accurately measure)
												1100	550	1650
												0	0	0
												0	0	0
												0	0	0

## Sheet: Day5_5_25
SINGLE LEAK DETECTION & QUANTIFICATION: YES/NO 5 and 15 MIN/LEAK
Notes: The day was cold (54 F), windy, and rainy
Measurement Time Block	Round Number	Source 1	Source 2	Source 3	Temperature	Measurement Teams
8:05 am - 8:10 am	1	250	0	0	52	C
8:15 am - 8:20 am	2	500	0	0	51	C
8:30 am - 8:35 am	3	300	0	0	52	C
8:40 am - 8:45 am	4	520	0	0	51	C
8:50 am - 8:55 am	5	200	0	0	53	C
9:00 am - 9:05 am	6	0	0	0		C
9:10 am - 9:25 am	7	750	0	0	51	C
9:30 am - 9:45 am	8	510	0	0	52	C
9:50 am - 10:05 am	9	240	0	0	52	C
10:10 am - 10:25 am	10	420	0	0	52	C
10:30 am - 10:45 am	11	130	0	0	56	C
10:50 am - 11:05 am	12	0	0	0		C
11:05 am - 11:20 am	13	300	0	0	60	C
