# Supplementary material for: Single-blind inter-comparison of methane detection technologies – results from the Stanford/EDF Mobile Monitoring Challenge
Source: Oxford University Press journal article supplement (doi:10.1525/elementa.373), 2019-01-01
Supplement: elementa-7-373-s11.xlsx [file elementa-7-373-s11.xlsx]

## Sheet: ReadME
			NOTES
			1	Release rates are in standard cubic feet per hour (scfh)
			2	Gas composition is approximately 91% methane ; Flow rates are given in whole gas flow rate
			3	All times are in local Pacific Standard Time
			4	Release data for each day is given in a separate tab
			5	Example Table data
				Measurement Time Block	Round Number	Source 1	Source 2	Source 3	Temperature	Measurement Teams
				Measurement Time Block		Approximate time interval for measurement in that particular round
				Round Number		Round number for each day
				Source 1 - 3		Source location (see image below)
				Temperature		Gas temperature at the location of the flow meters in degrees Farenheit
				Measurement Teams		Teams measuring in a particular round
					B	Ball Aerospace
					C	University of Calgary Truck
					Drone	University of Calgary Drone
			6	Cell shading guidelines
					Green	Leak correctly identified
					Red	Incorrect leak identification (either false positive or false negative)

## Sheet: Day1_5_21
SINGLE LEAK BINARY DETECTION: YES/NO 10 MIN/LEAK
Measurement Time Block	Round Number	Source 1	Source 2	Source 3	Temperature	Measurement Teams	Location
												1	scfh	19.5	g/h
8:32 am - 8:42 am	1	75	0	0	64	B/C	Wrong location							0.00541667	g/s
8:48 am - 8:58 am	2	0	160	0	65	B/C			Quantification for day 1 (this team quantified all leaks)
9:03 am - 9:13 am	3	0	0	118	70	B/C			Actual	Measured	Measured
9:18 am - 9:28 am	4	0	288	0	69	B/C				g/s	scfh
9:33 am - 9:43 am	5	0	0	0		B/C			75	0.51	94.1538
9:48 am - 9:58 am	6	0	390	0	75	B/C	Wrong location		160	0.54	99.6923
10:03 am - 10:13 am	7	0	0	65	75	B/C			288	0.21	38.7692
10:18 am - 10:28 am	8	140	0	0	71	B/C			0	0	0
10:33 am - 10:43 am	9	0	0	285	76	B			390	0.5	92.3077
10:48 am - 10:58 am	10	0	155	0	73	B/C			65	0.45	83.0769
11:03 am - 11:13 am	11	420	0	0	78	B/C			140	0.11	20.3077
11:18 am - 11:28 am	12	0	72	0	76	B/C			155	0.28	51.6923
									420	0.29	53.5385
2:51 pm - 3:01 pm	13	0	125	0	84	C			72	0	0
3:05 pm - 3:15 pm	14	0	0	120	85	C	Wrong location		125	0.07	12.9231
3:20 pm - 3:35 pm	15	0	200	0	84	C			120	0.01	1.84615
3:35 pm - 3:45 pm	16	0	0	244	83	C			200	0.03	5.53846
3:50 pm - 4:00 pm	17	74	0	0	86	C			244	0.35	64.6154
									74	0.06	11.0769
									118	0.26	48

## Sheet: Day2_5_22
SINGLE LEAK BINARY DETECTION: YES/NO 10 MIN/LEAK
Measurement Time Block	Round Number	Source 1	Source 2	Source 3	Temperature	Measurement Teams	Location
												1	scfh	19.5	g/h
8:25 am - 8:35 am	1	315	0	0	63	B/C								0.00541667	g/s
8:40 am - 8:50 am	2	0	430	0	62	B/C	Wrong location		Quantification data for day 2
8:55 am - 9:05 am	3	0	590	0	63	B/C	Wrong Location		Actual	Measured	Measured
9:10 am - 9:20 am	4	0	0	570	65	B/C				g/s	scfh
9:25 am - 9:35 am	5	800	0	0	64	B/C			315	0.57	105.231
9:40 am - 9:50 am	6	0	310	0	65	B/C			430	0.51	94.1538
9:55 am - 10:05 am	7	0	0	0		B/C			590	2.41	444.923
10:10 am - 10:20 am	8	190	0	0	71	B			570	2.05	378.462
10:25 am - 10:35 am	9	0	410	0	73	B/C			800	0.87	160.615
10:40 am - 10:50 am	10	0	0	210	75	B/C			310	0.49	90.4615
10:55 am - 11:05 am	11	0	110	0	74	C			410	0.26	48
11:10 am - 11:20 am	12	0	42	0	75	C	Wrong location		210	0.94	173.538
									110	0.25	46.1538
SINGLE LEAK DETECTION AND QUANTIFICATION - 25 MIN/LEAK (only UC Truck)									42	0.06	11.0769
Long distance measurements (these measurements were estimate from the highway ~ 1 mile from the source)									800	1.52	280.615
									440	2.63	485.538
1:35 pm - 1:50 pm	13	Background measurements; No releases				C			0	0.1	18.4615
1:55 pm - 2: 20 pm	14	0	0	800	82	C	Wrong location
2:25 pm - 2:40 pm	15	0	200	0	84
2:50 pm - 3:25 pm	16	0	0	440	82	C
3:40 pm - 4:05 pm	17	0	0	780	84	C

## Sheet: Day3_5_23
SINGLE LEAK DETECTION/QUANTIFICATION
Measurement Time Block	Round Number	Source 1	Source 2	Source 3	Temperature	Measurement Teams
												1	scfh	19.5	g/h
8:25 am - 8:45 am	1	0	560	0	65	Drone			Quantification for day 3					0.00541667	g/s
8:55 am - 9:10 am	2	0	720	0	63	Drone			Actual	Measured	Measured
9:15 am - 9:30 am	3	1240	0	0	63	Drone				g/s	scfh
9:35 am - 9:50 am	4	1450	0	0	65	Drone			244	0.65	120
									130	0.51	94.1538
10:55 am - 11:05 am	5	0	800	0	71	B			340	0.86	158.769
11:08 am - 11:23 am	6	1225	0	0	70	B/Drone			0	0.15	27.6923
11:28 am - 11:43 am	7	0	540	0	73	B/Drone			75	0.14	25.8462
11:48 am - 12:03 pm	8	1400	0	0	72	B/Drone			515	1.59	293.538
12:08 pm - 12:23 pm	9	0	780	0	73	B/Drone			240	0.29	53.5385
12:28 pm - 12:38 pm	10	0	0	320	74	B			130	0.54	99.6923
									510	0.63	116.308
SINGLE LEAK DETECTION: 5 MIN/LEAK (only UC Truck)									0	0.1	18.4615
									75	0.19	35.0769
2:25 pm - 2:30 pm	1	244	0	0	76	C			340	0.19	35.0769
2:35 pm - 2:40 pm	2	0	130	0	78	C	Wrong location
2:45 pm - 2:50 pm	3	0	0	340	76	C
2:55 pm - 3:00 pm	4	0	0	0		C	Likely seeing tank
3:05 pm - 3:10 pm	5	75	0	0	79	C
3:15 pm - 3:20 pm	6	515	0	0	75	C
3:25 pm - 3:30 pm	7	0	240	0	76	C
3:35 pm - 3:40 pm	8	130	0	0	78	C	Wrong location
3:45 pm - 3:50 pm	9	0	510	0	76	C	Wrong location
3:55 pm - 4:00 pm	10	0	0	0		C	Likely seeing tank
4:05 pm - 4:10 pm	11	0	75	0	78	C	Wrong location
4:15 pm - 4:20 pm	12	340	0	0	76	C	Wrong location

## Sheet: Day4_5_24
MULTI-LEAK QUANTIFICATION: 15 MIN/LEAK
Measurement Time Block	Round Number	Source 1	Source 2	Source 3	Temperature			Measurement Teams
					Source 1	Source 2	Source 3								1	scfh	19.5	g/h
8:20 am - 8:35 am	1	200	230	0	70	70		B/C									0.00541667	g/s
8:40 am - 8:55 am	2	0	50	440		72	73	B/C
9:00 am - 9:15 am	3	140	130	130	73	73	78	B/C			Quantification for day 4
9:20 am - 9:35 am	4	460	0	0	77			B/C	Location wrong		Actual	Measured	Measured
9:40 am - 9:55 am	5	520	0	150	77		81	B/C	Location wrong			g/s	scfh
10:00 am - 10:15 am	6	0	610	0		76		B/C			200	0.03	5.53846
10:20 am - 10:35 am	7	200	200	520	76	76	77	B/C			230	0.12	22.1538
10:40 am - 10:55 am	8	0	0	0				B/C			0	0.1	18.4615
11:00 am - 11:15 am	9	110	320	0	79	81		B/C			0	0	0
11:20 am - 11:35 am	10	0	0	400			84	B/C			50	0.08	14.7692
11:40 am - 11:55 am	11	680	145	0	83	81		B/C	Location wrong		440	0	0
12:00 pm - 12:15 pm	12	150	620	155	81	80	85	B/C			140	0	0
12:20 pm - 12:35 pm	13	140	0	135	80		87	B/C	Location wrong		130	0.13	24
											130	0.16	29.5385
											460	5.24	967.385
2:30 pm - 2:50 pm	14	Baseline measurements						C			0	0	0
3:00 pm - 3:15 pm	15	300	190	0	84	85		C			0	0	0
3:20 pm - 3:35 pm	16	610	0	160	81		84	C	Location wrong		520	0.16	29.5385
3:40 pm - 3:55 pm	17	0	240	0		84		C			0	0	0
4:00 pm - 4:15 pm	18	500	100	300	81	84	80	C			150	0.78	144
											0	0.11	20.3077
											610	0.17	31.3846
											0	0	0
											200	0.22	40.6154
											200	0.17	31.3846
											520	0.22	40.6154
											0	0	0
											0	0.15	27.6923
											0	0	0
											110	0	0
											320	0.11	20.3077
											0	0	0
											0	0	0
											0	0.1	18.4615
											400	2.37	437.538
											680		0	na	wind too low to estimate
											145		0	na
											0		0	na
											150	0	0
											620	0.06	11.0769
											155	0	0
											140	0.08	14.7692
											0	0	0
											135	0.13	24
											300	1.52	280.615
											190	0.25	46.1538
											0	0.08	14.7692
											610	0.2	36.9231
											0	0	0
											160	0.05	9.23077
											0	0.69	127.385
											240	0.16	29.5385
											0	0	0
											500	0.39	72
											100	0.58	107.077
											300	0.21	38.7692

## Sheet: Day5_5_25
SINGLE LEAK DETECTION & QUANTIFICATION: YES/NO 5 and 15 MIN/LEAK
Notes: The day was cold (54 F), windy, and rainy
Measurement Time Block	Round Number	Source 1	Source 2	Source 3	Temperature	Measurement Teams
												1	scfh	19.5	g/h
8:05 am - 8:10 am	1	250	0	0	52	C	No data (rain)		Quantification data for day 5					0.00541667	g/s
8:15 am - 8:20 am	2	500	0	0	51	C			Actual	Measured	Measured
8:30 am - 8:35 am	3	300	0	0	52	C	No data (rain)			g/s	scfh
8:40 am - 8:45 am	4	520	0	0	51	C	No data (rain)
8:50 am - 8:55 am	5	200	0	0	53	C			500	0.46	84.9231
9:00 am - 9:05 am	6	0	0	0		C			200	2.57	474.462
									0	0.01	1.84615
9:10 am - 9:25 am	7	750	0	0	51	C			750	3.44	635.077
9:30 am - 9:45 am	8	510	0	0	52	C			510	0.59	108.923
9:50 am - 10:05 am	9	240	0	0	52	C			240	0.18	33.2308
10:10 am - 10:25 am	10	420	0	0	52	C			420	0.47	86.7692
10:30 am - 10:45 am	11	130	0	0	56	C			130	0.28	51.6923
10:50 am - 11:05 am	12	0	0	0		C			0	0.31	57.2308
11:05 am - 11:20 am	13	300	0	0	60	C			300	0.51	94.1538
