# Supplementary material for: Single-blind inter-comparison of methane detection technologies – results from the Stanford/EDF Mobile Monitoring Challenge
Source: Oxford University Press journal article supplement (doi:10.1525/elementa.373), 2019-01-01
Supplement: elementa-7-373-s12.xlsx [file elementa-7-373-s12.xlsx]

## Sheet: ReadME
			NOTES
			1	Release rates are in standard cubic feet per hour (scfh)
			2	Gas composition is approximately 91% methane ; Flow rates are given in whole gas flow rate
			3	All times are in local Pacific Standard Time
			4	Release data for each day is given in a separate tab
			5	Example Table data
				Measurement Time Block	Round Number	Source 1	Source 2	Source 3	Temperature	Measurement Teams
				Measurement Time Block		Approximate time interval for measurement in that particular round
				Round Number		Round number for each day
				Source 1 - 3		Source location (see image below)
				Temperature		Gas temperature at the location of the flow meters in degrees Farenheit
				Measurement Teams		Teams measuring in a particular round
					B	Ball Aerospace
					C	University of Calgary Truck
					Drone	University of Calgary Drone
			6	Cell shading guidelines
					Green	Leak correctly identified
					Red	Incorrect leak identification (either false positive or false negative)

## Sheet: Day3_5_23
SINGLE LEAK DETECTION/QUANTIFICATION
Measurement Time Block	Round Number	Source 1	Source 2	Source 3	Temperature	Measurement Teams
												1	scfh	19.5	g/h
8:25 am - 8:45 am	1	0	560	0	65	Drone	Wrong location		Quantification data for day 3					0.00541667	g/s
8:55 am - 9:10 am	2	0	720	0	63	Drone			Actual	Measured	Measured
9:15 am - 9:30 am	3	1240	0	0	63	Drone			scfh	g/s	scfh
9:35 am - 9:50 am	4	1450	0	0	65	Drone
									560	7.62	1406.77
10:55 am - 11:05 am	5	0	800	0	71	B			720	1.29	238.154		0	0
11:08 am - 11:23 am	6	1225	0	0	70	B/Drone			1240	3.19	588.923		300	300
11:28 am - 11:43 am	7	0	540	0	73	B/Drone	Wrong location		1450	2.46	454.154		600	600
11:48 am - 12:03 pm	8	1400	0	0	72	B/Drone			1225	2.43	448.615		900	900
12:08 pm - 12:23 pm	9	0	780	0	73	B/Drone	Wrong location		540	4.08	753.231		1200	1200
12:28 pm - 12:38 pm	10	0	0	320	74	B			1400	3.31	611.077		1500	1500
									780	7.29	1345.85
SINGLE LEAK DETECTION: 5 MIN/LEAK (only UC Truck)
									Note: The University of Calgary Drone system was only able to fly on Wednesday (5/23/2018)
2:25 pm - 2:30 pm	1	244	0	0	76	C
2:35 pm - 2:40 pm	2	0	130	0	78	C
2:45 pm - 2:50 pm	3	0	0	340	76	C
2:55 pm - 3:00 pm	4	0	0	0	84	C
3:05 pm - 3:10 pm	5	75	0	0	79	C
3:15 pm - 3:20 pm	6	515	0	0	75	C
3:25 pm - 3:30 pm	7	0	240	0	76	C
3:35 pm - 3:40 pm	8	130	0	0	78	C
3:45 pm - 3:50 pm	9	0	510	0	76	C
3:55 pm - 4:00 pm	10	0	0	0		C
4:05 pm - 4:10 pm	11	0	75	0	78	C
4:15 pm - 4:20 pm	12	340	0	0	76	C
