# Supplementary material for: Single-blind inter-comparison of methane detection technologies – results from the Stanford/EDF Mobile Monitoring Challenge
Source: Oxford University Press journal article supplement (doi:10.1525/elementa.373), 2019-01-01
Supplement: elementa-7-373-s13.xlsx [file elementa-7-373-s13.xlsx]

## Sheet: Read ME
			NOTES
			1	All times are in local Mountain Time
			2	Release data for each day is given in a separate tab
			3	Example Table data
				Measurement Time Block	Round Number	Time per leak (min)	Mean Wind Direction (degrees)	Mean Wind Speed	Percentage in 40 deg cone	Cone Size (half angle)	Pad 1	Pad 2	Pad 3	Pad 4	Pad 5
				Measurement Time Block		Approximate time interval for measurement in that particular round
				Round Number		Round number for each day where a team stays on the same pad
				Time per leak (min)		Time allotted for measurement (both detection and/or quantification)
				Mean Wind Direction		Vector average wind direction for the duration of the round (10 min or 20 min)
				Mean Wind Speed		Vector average wind speed for the duration of the round (10 min or 20 min)
				Percentage in 40 degree cone		Fraction of total measurement time during which the instantaneous wind is within a 40 degree cone (20 degree half angle) of the mean wind direction
				Cone Size (half angle)		If the 40 degree cone does not include at least 50% of instantaneous wind, we calculate the cone half angle above 20 degrees needed to include at least 50% of instantaneous wind
				Pad 1 - 5		Pad numbers based on the figure below
					Information available for each pad (also see supplementary material)
					L00	No leak on current pad and no leak on any upwind pad
					L01	No leak on current pad and leak on at least one upwind pad
					L11	Leak on current pad and leak on at least one upwind pad
					L10	Leak on current pad and no leak on any upwind pad
			4	Cell Shading Guidelines
					Type	Definition				Shading
					Weak Interference	Interference considered only for those tests where the average wind speed was greater than or equal to 2 m/s.				Red shaded tests are discarded in weak-interference analysis
					Strong Interference	Interference is considered for all tests, irrespective of average wind speed.				Red shaded tests are discarded in strong-interference analysis

## Sheet: Day1_5_7
SINGLE LEAK BINARY DETECTION - YES/NO, 10 MIN/LEAK
Measurement Time Block	Round Number	Time per leak (min)	Mean Wind Direction (degrees)	Mean Wind Speed	Percentage in 40 deg cone	Cone Size (half angle)	Pad 1	Pad 2	Pad 3	Pad 4	Pad 5		Class	Count
10:16 am - 10:28 am	1	10	131.3	0.8	7.7	0	L00	L00	L10	L10	L10		L00	29
10:35 am - 10:45 am			195.7	0.9	63.7	0	L10	L10	L00	L00	L10		L10	25
10:50 am - 11:00 am			156.8	1.7	91	0	L00	L00	L00	L00	L00		L11	1
11:24 am - 11:34 am	2	10	132	2.6	81.9	20	L10	L10	L01	L01	L00		L01	2
11:41 am - 11:51 am			127.1	2.5	63.7	20	L00	L10	L11	L00	L00
11:58 am - 12:08 am			149.2	2.2	27.3	25.4	L00	L00	?	?	?		TOTAL	57
1:45 pm - 1:55 pm	3	10	140.5	0.4	27.3	0	L00	L00	L10	L10	L10
2:03 pm - 2:13 pm			72.1	1.3	45.5	0	L10	L10	L10	L00	L00
2:20 pm - 2:30 pm			72.2	0.5	9.1	0	L00	L00	L00	L00	L00
2:48 pm - 2:58 pm	4	10	134.9	1	27.3	0	L10	L00	L10	L10	L00
3:01 pm - 3:11 pm			181.1	2.5	100	20	L00	L00	L10	L10	L10
3:20 pm - 3:30 pm			176.1	1.8	100	0	L00	L10	L10	L10	L10

## Sheet: Day2_5_8
Measurement Time Block	Round Number	Time per leak (min)	Mean Wind Direction (degrees)	Mean Wind Speed	Percentage in 40 deg cone	Cone Size (half angle)	Pad 1	Pad 2	Pad 3	Pad 4	Pad 5		Class	Count
SINGLE LEAK BINARY DETECTION - YES/NO, 10 MIN/LEAK
9:26 am - 9:36 am	1	10	156.5	1	36.4	0	L10	L10	L10	L10	L10		L00	30
9:43 am - 9:53 am			163.6	2.3	81.9	20	L00	L00	L10	L10	L10		L10	64
9:59 am - 10:10 am			112.3	1.4	33.4	0	L10	L10	L00	L00	L10		L11	3
10:23 am - 10:33 am	2	10	98.1	1.1	45.5	0	L00	L00	L10	L10	L10		L01	8
10:38 am - 10:48 am			104.2	2.2	81.9	20	L00	L10	L10	L00	L00
10:54 am - 11:05 am			149	2.3	33.4	25.3	L10	L10	L01	L01	L10		TOTAL	105
11:32 am - 11:42 am	3	10	199.3	2.9	81.9	20	L10	L00	L10	L10	L11
11:47 am - 11:57 am			179.9	2.1	72.8	20	L10	L10	L10	L01	L01
12:03 pm - 12:13 pm			176.6	2.1	63.7	20	L00	L00	L10	L10	L10
SINGLE LEAK BINARY DETECTION - YES/NO, 5 MIN/LEAK + 1 MIN/LEAK SET UP
1:39 pm - 1:45 pm	4	5	200.6	3	85.8	20	L00	L00	L10	L10	L10
1:48 pm - 1:54 pm			184.5	3.1	100	20	L10	L10	L10	L11	L11
2:00 pm - 2:06 pm			146	3.3	57.2	20	L00	L00	L10	L10	L10
2:12 pm - 2:18 pm			159.5	2.9	85.8	20	L00	L00	L00	L00	L00
2:35 pm - 2:41 pm	5	5	230.4	1.6	71.5	0	L10	L00	L10	L10	L10
2:48 pm - 2:54 pm			183	2.6	85.8	20	L10	L10	L10	L01	L01
3:04 pm - 3:10 pm			163.1	1.6	57.2	0	L00	L00	L10	L10	L10
3:17 pm - 3:23 pm			147.8	0.5	0	0	L00	L10	L10	L10	L10
3:39 pm - 3:45 pm	6	5	331.1	0.1	0	0	L10	L10	L10	L10	L00
3:50 pm - 3:56 pm			218.9	2.1	85.8	20	L00	L00	L10	L10	L10
4:03 pm - 4:09 pm			212.5	1.7	42.9	0	L10	L00	L00	L10	L10
4:15 pm - 4:21 pm			191.9	2.5	100	20	L10	L10	L10	L01	L01

## Sheet: Day3_5_9
Measurement Time Block	Round Number	Time per leak (min)	Mean Wind Direction (degrees)	Mean Wind Speed	Percentage in 40 deg cone	Cone Size (half angle)	Pad 1	Pad 2	Pad 3	Pad 4	Pad 5		Class	Count
SINGLE LEAK BINARY DETECTION - YES/NO, 5 MIN/LEAK
9:05 am - 9:11 am	1	5	30.4	0.7	71.5	0	L10	L10	L10	L10	L10		L00	29
9:16 am - 9:22 am			63.6	1.3	85.8	0	L10	L10	L10	L00	L00		L10	68
9:30 am - 9:36 am			47.5	1.6	57.2	0	L00	L00	L10	L10	L10		L11	1
9:40 am - 9:46 am			49.3	1.7	100	0	L10	L00	L00	L10	L10		L01	2
10:08 am - 10:14 am	2	5	352.2	1	14.3	0	L10	L00	L10	L10	L00
10:16 am - 10:22 am			4.4	1	0	0	L00	L00	L00	L00	L00		TOTAL	100
10:28 am - 10:34 am			347.9	1.1	14.3	0	L10	L10	L10	L10	L10
10:41 am - 10:47 am			295.5	1.2	71.5	0	L10	L10	L10	L00	L00
11:01 am - 11:07 am	3	5	14.8	1	0	0	L10	L00	L10	L10	L00
11:14 am - 11:20 am			350.4	0.9	57.2	0	L10	L10	L10	L00	L10
11:25 am - 11:31 am			20.9	1.2	57.2	0	L10	L10	L00	L00	L10
11:38 am - 11:44 am			61.2	1.5	71.5	0	L00	L00	L10	L10	L10
SINGLE LEAK QUNATIFICATION - 20 MIN/LEAK
1:08 pm - 1:28 pm	4	20	91.8	1.5	57.2	0	L10	L10	L10	L10	L10
1:34 pm - 1:54 pm			127.1	0.3	4.8	0	L10	L10	L10	L10	L10
2:05 pm - 2:25 pm	5	20	143.2	1.5	14.3	0	L10	L10	L10	L00	L00
2:30 pm - 2:50 pm			58.6	1.4	42.9	0	L00	L00	L10	L10	L10
2:58 pm - 3:18 pm	6	20	349.6	1.7	23.9	0	L10	L10	L10	L10	L10
3:24 pm - 3:44 pm			183.9	2.5	76.2	20	L10	L00	L10	L10	L01
3:51 pm - 4:11 pm	7	20	200.8	3.7	100	20	L10	L00	L10	L10	L11
4:16 pm - 4:36 pm			181.8	3	100	20	L00	L10	L10	L01	L10

## Sheet: Day4_5_10
Measurement Time Block	Round Number	Time per leak (min)	Mean Wind Direction (degrees)	Mean Wind Speed	Percentage in 40 deg cone	Cone Size (half angle)	Pad 1	Pad 2	Pad 3	Pad 4	Pad 5		Class	Count
MULTI-LEAK QUANTIFICATION - Upto 3 leaks/pad
9:23 am - 9:43 am	1a	20	2.2	0.4	9.6	0	L10	L10	L10	L10	L10		L00	8
													L10	47
													L11	3
9:55 am - 10:15 am	1b	20	72.2	0.9	42.9	0	L10	L10	L10	L10	L10		L01	2
													TOTAL	60
10:29 am - 10:50 am	2a	20	88.7	1.5	50	0	L10	L10	L10	L10	L10
11:00 am - 11:20 am	2b	20	128.6	1.3	19.1	0	L10	L10	L10	L10	L10
11:30 am - 11:50 am	3a	20	159.1	3.1	57.2	20	L00	L00	L10	L10	L10
12:04 pm - 12:24 pm	3b	20	148.7	3.3	66.7	20	L10	L10	L11	L01	L01
1:45 pm - 2:05 pm	4a	20	106.5	1.1	9.6	0	L10	L10	L10	L10	L10
2:13 pm - 2:33 pm	4b	20	313.5	2	62	20	L11	L11	L10	L10	L10
2:47 pm - 3:07 pm	5a	20	19.3	1.4	47.7	0	L10	L10	L10	L10	L10
3:18 pm - 3:38 pm	5b	20	102.3	0.3	9.6	0	L10	L10	L00	L00	L10
3:46 pm - 4:06 pm	6a	20	51.7	1.5	42.9	0	L00	L00	L10	L10	L10
4:25 pm - 4:45 pm	6b	20	10.1	8	100	20	L10	L10	L10	L00	L00
